# Supplementary material for: CD73 Promotes Chronic Lymphocytic Leukemia
Source: MDPI journal article supplement (doi:10.3390/cancers14133130), 2022-06-26
Supplement: s1 [file s1]

Supp. Figure S1

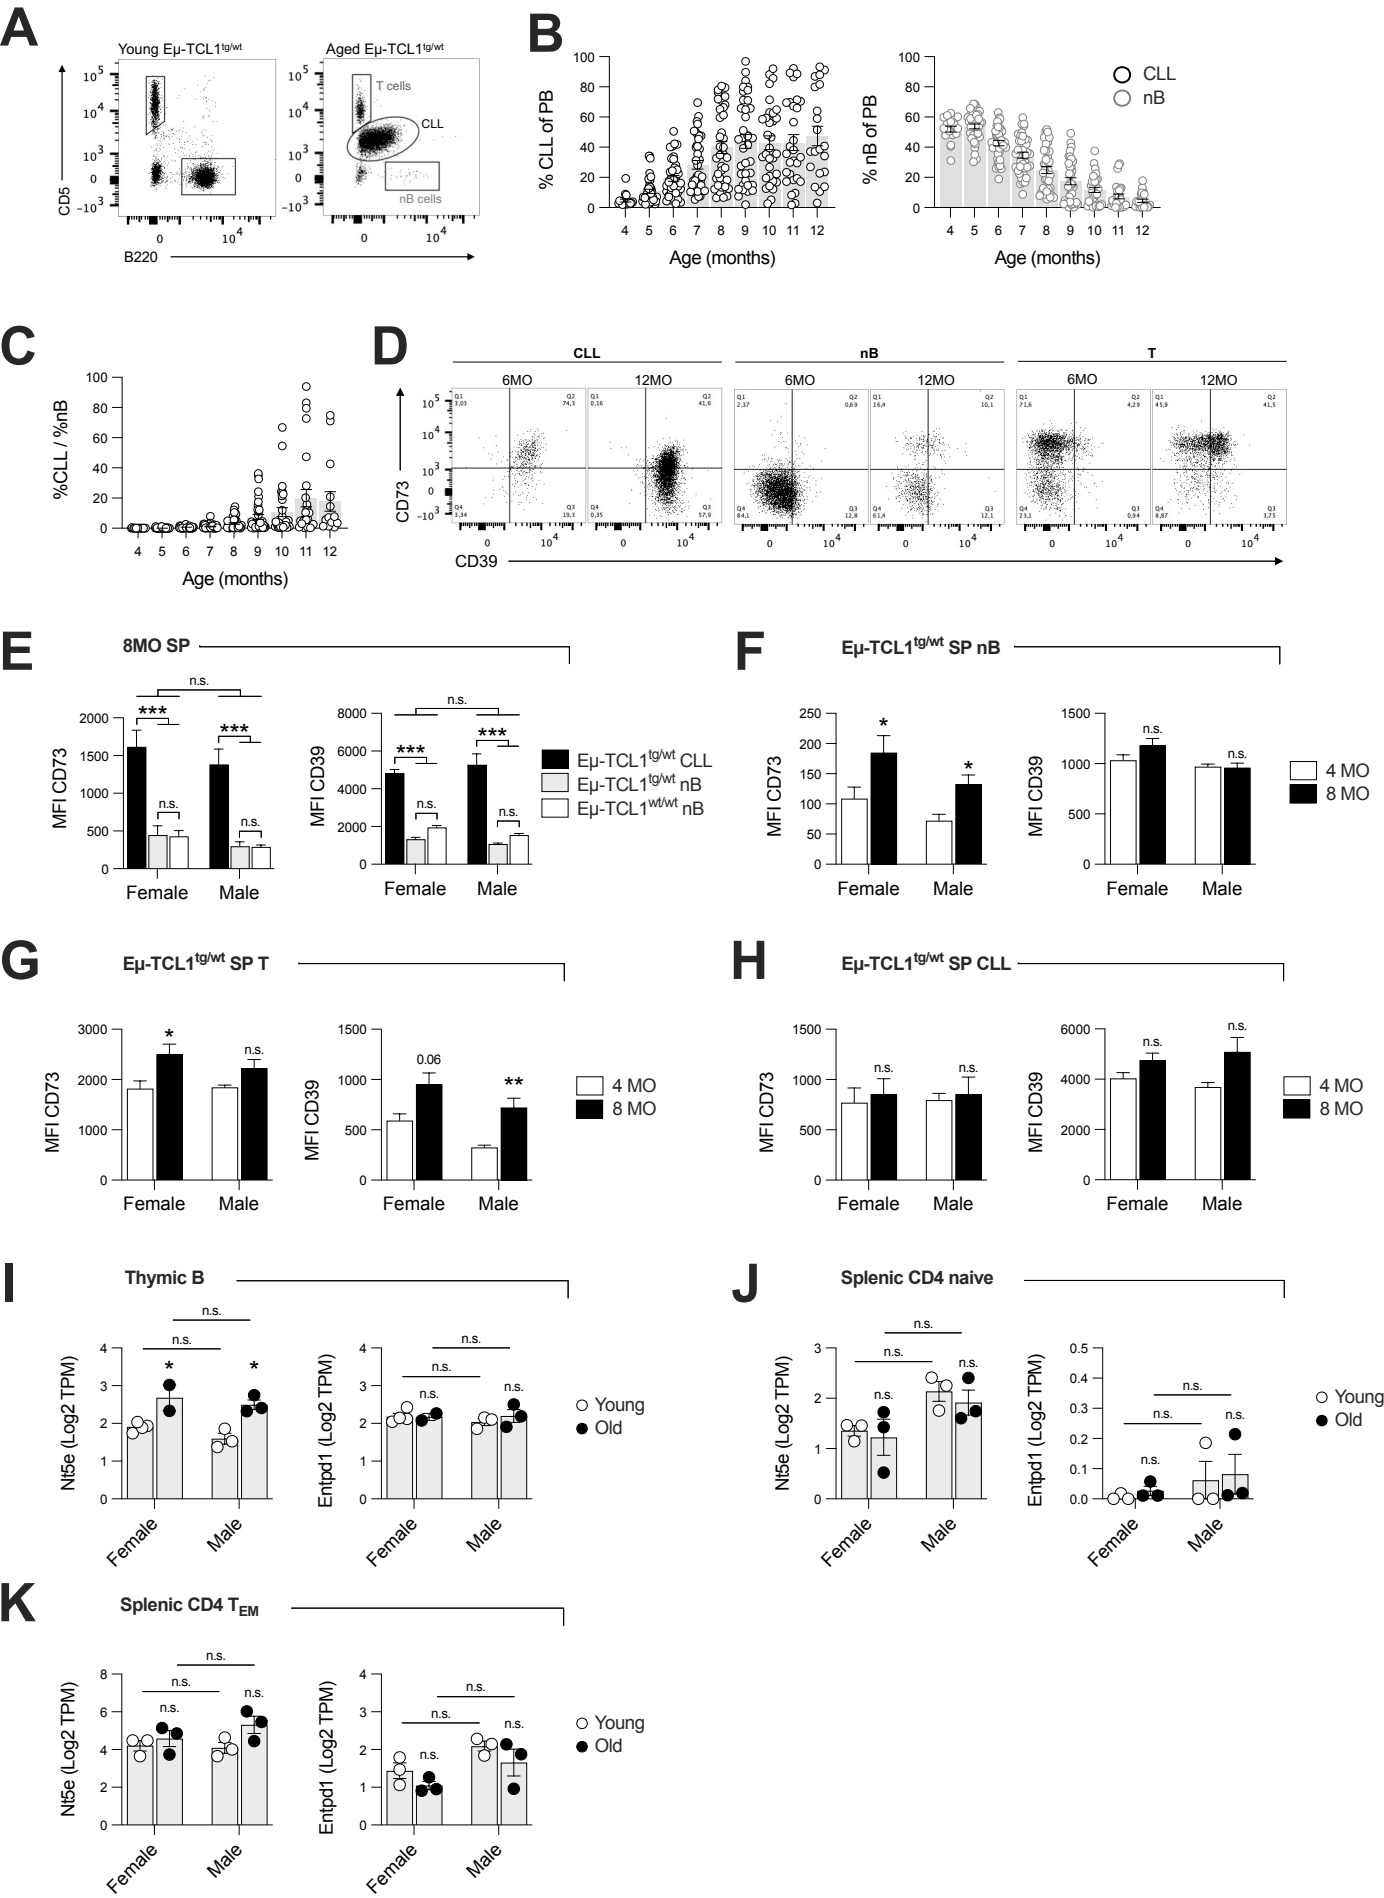

**Figure S1. Characterization of CLL disease progression and CD73 and CD39 expression in Eμ-TCL1 transgenic mice.** **A** Peripheral blood (PB) from young (2 months-old) and aged (12 months-old) Eμ-TCL1<sup>tg/wt</sup> mice was analyzed by flow cytometry using anti- CD5 and B220 fluorescent antibodies. Example of the gating strategy employed to delineate circulating populations is shown. **B** Percentage of leukemic cells (CLL) and normal B cells (nB) in PB of Eμ-TCL1<sup>tg/wt</sup> mice over time. **C** Ratio of leukemic CLL cells over nB cells populations in PB of Eμ-TCL1<sup>tg/wt</sup> mice over time. N=14 males and 22 females. **D** Representative raw FACS plot for CD73 and CD39 expression from paired Eμ-TCL1<sup>tg/wt</sup> 6 and 12 months-old peripheral leukemic cells (CLL; left panels), normal B cells (nB; middle panels) and T cells (T; right panels). **E-H** Spleens (SP) of male (M) and female (F) Eμ-TCL1<sup>tg/wt</sup> mice was analyzed at 4- (early stage; n=5 F and n=5 M) and 8- (advanced stage; n=5 F and n=5 M) months-old (MO). CD73 (left) and CD39 (right) expression levels are showed by mean fluorescence intensity (MFI). **E** CD73 and CD39 expression is compared between 4 months-old splenic leukemic CLL cells and nB cells from Eμ-TCL1<sup>tg/wt</sup> mice and nB cells from age-matched Eμ-TCL1<sup>wt/wt</sup> littermate controls. **F-H** CD73 and CD39 expression is compared between 4 and 8 months-old (F) nB cells, (G) pan-T cells (T) and (H) leukemic CLL cells. **I-K** CD73 (*Nt5e*) and CD39 (*Entdp1*) gene expression levels were compared between young and old healthy C57Bl/6 mice. For the thymic B cell cohort (I), mice were classified as young (age ≤ 8 weeks) and old (age ≥ 40 weeks). For the CD4<sup>+</sup> T cell cohort (naive CD4 T cells (J) and effector memory T cells (K)), mice were classified as young (age ≤ 11 weeks) and old (age ≥ 83 weeks). Means +/- SEM are shown (\*p<0.05; \*\*p<0.01; \*\*\*p<0.001 by 2-way ANOVA). nB, normal B cells; PB, peripheral blood; MO, months; SP, spleen; MFI, mean fluorescence intensity; TPM, transcripts per million; n.s., non-significant.

Supp. Figure S2

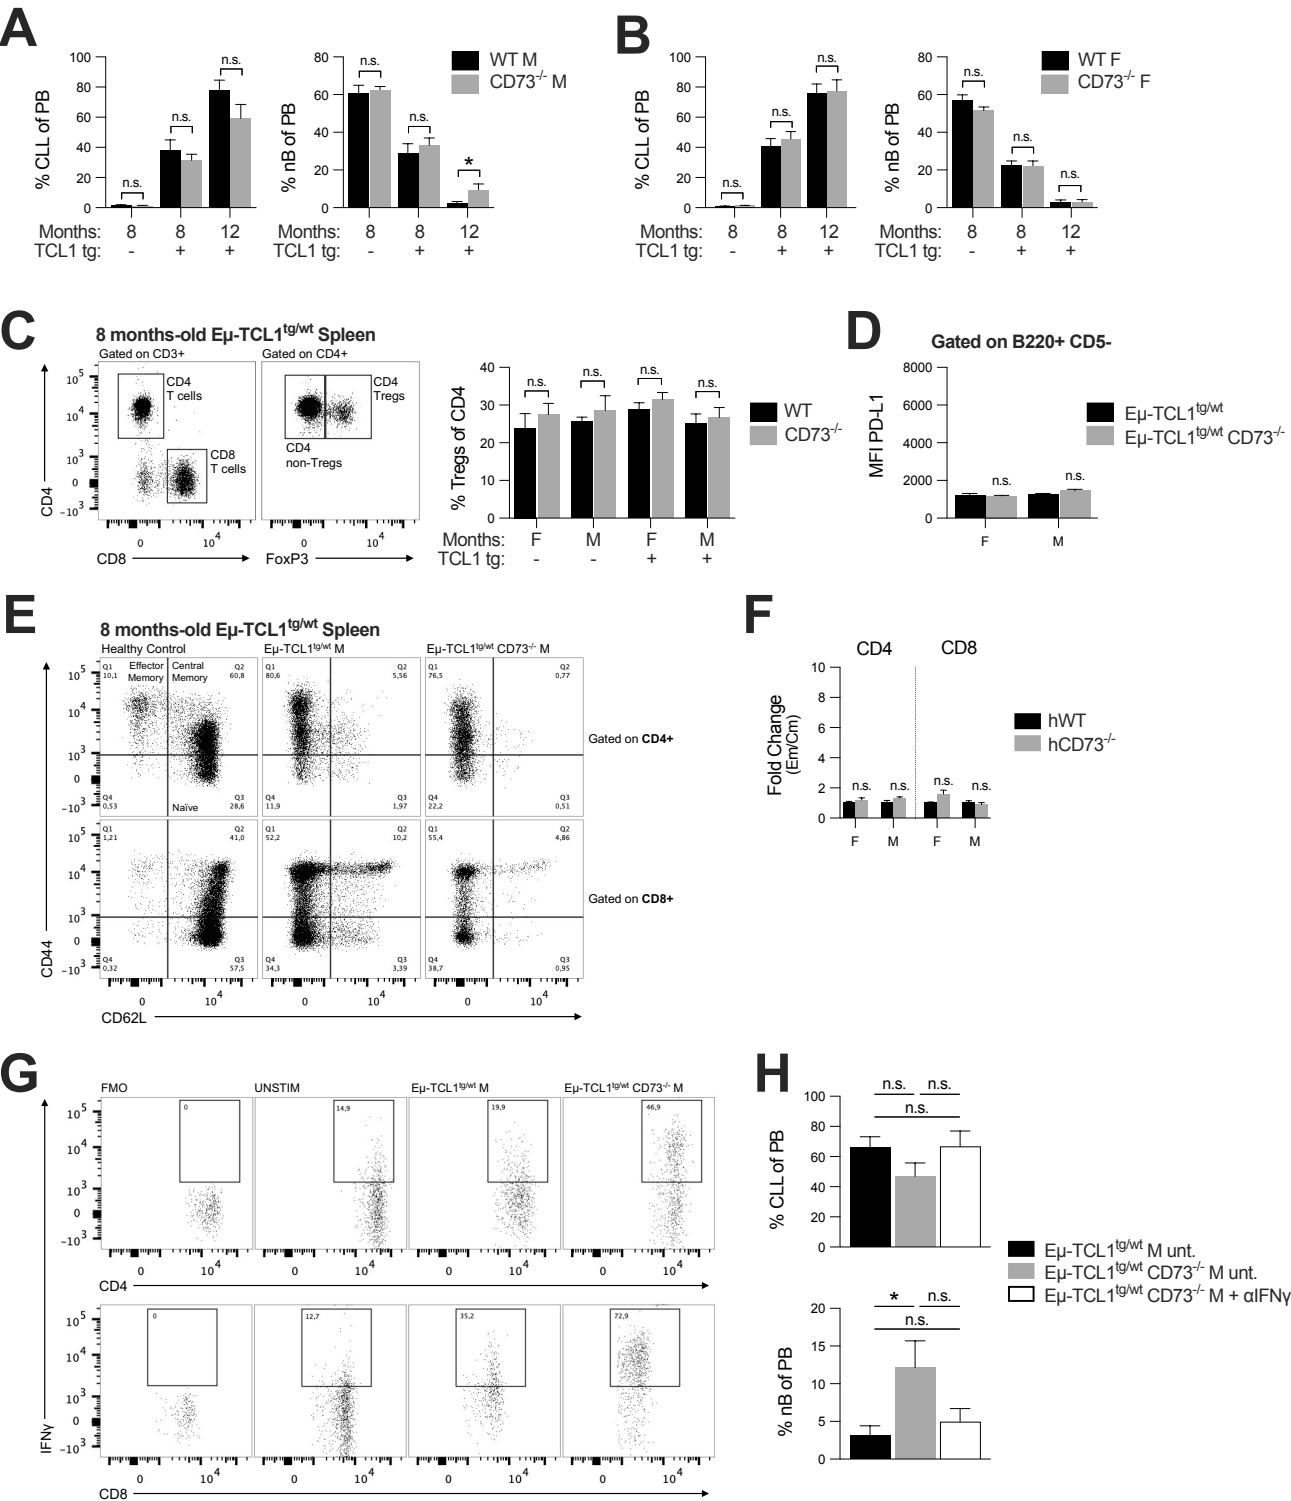

**Figure S2. Comparison of CLL disease progression between  $E\mu$ -TCL1<sup>tg/wt</sup> and  $E\mu$ -TCL1<sup>tg/wt</sup> CD73<sup>-/-</sup> mice.**  $E\mu$ -TCL1<sup>tg/wt</sup> mice were crossed with CD73<sup>-/-</sup> mice and leukemia progression was analyzed. **A-B** Percentages of circulating leukemic cells (CLL; left panels) and normal B cells (nB; right panels) in peripheral blood (PB) of  $E\mu$ -TCL1<sup>tg/wt</sup> and  $E\mu$ -TCL1<sup>tg/wt</sup> CD73<sup>-/-</sup> males (**A**) and females (**B**) aged 8 and 12 months-old (complement to figure 2). Non-leukemic hWT and hCD73<sup>-/-</sup> mice are shown as healthy controls. **C-F** 8 months-old  $E\mu$ -TCL1<sup>tg/wt</sup> and  $E\mu$ -TCL1<sup>tg/wt</sup> CD73<sup>-/-</sup> male (M) and female (F) mice were sacrificed, and spleens' single cell suspensions were analyzed by cytometry (complement to figure 4A-B). Non-leukemic hWT and hCD73<sup>-/-</sup> mice are shown as healthy controls. **C** Gating strategy and percentages of FoxP3<sup>+</sup> Tregs out of CD4 T cells. **D** PD-L1 expression levels (MFI) on normal B cells (nB) of  $E\mu$ -TCL1<sup>tg/wt</sup> mice. **E** Gating strategy to define effector memory (CD44<sup>+</sup>CD62L<sup>-</sup>), central memory (CD44<sup>+</sup>CD62L<sup>+</sup>) or naïve (CD44<sup>-</sup>CD62L<sup>+</sup>) phenotype of CD4 (top panels) and CD8 (bottom panels) splenic T cells. 8 weeks-old C57Bl/6 non-transgenic mice (Jackson laboratories) were used as healthy control. **F** Fold change of ratios of effector-memory (Em: CD44<sup>+</sup>CD62L<sup>-</sup>) to central-memory (Cm: CD44<sup>+</sup>CD62L<sup>+</sup>) CD4<sup>+</sup> and CD8<sup>+</sup> (gated on live CD3<sup>+</sup>) splenic T cells in hWT and hCD73<sup>-/-</sup> control mice. **G** Representative gating showing percentages of IFN $\gamma$ <sup>+</sup> CD4 (top) and CD8 (bottom) T cells upon in vitro stimulation (PMA/iono) for 6 hours (complement to figure 4C). **H** Percentage of circulating leukemic CLL (top) and nB (bottom) cells in anti-IFN gamma-treated CD73<sup>-/-</sup>  $E\mu$ -TCL1<sup>tg/wt</sup> male mice compared to control untreated  $E\mu$ -TCL1<sup>tg/wt</sup> mice (complement to figure 4D-E). Means  $\pm$  SEM are shown (\* $p$ <0.05; \*\* $p$ <0.01 by Mann-Whitney test (**A-D**) and by 1-way ANOVA (**H**)). PB, peripheral blood; M, male; F, female; tg, transgenic; hWT, healthy WT; Em, effector memory; Cm, central memory; FMO, fluorescence minus one; nB, normal B cells; unt., untreated; n.s., non-significant.
