# Supplementary material for: CD73 Promotes Chronic Lymphocytic Leukemia
Source: Cancers (Basel). 2022 Jun 26;14(13):3130. doi: 10.3390/cancers14133130 (PMC9264813; doi:10.3390/cancers14133130)
Supplement: Supplementary file 1 [file cancers-14-03130-s001.zip › Supplementary-Tables S1 and S2.xlsx]

## Sheet: Table S1
	Supplementary Table S1. Primers used for genotyping Eµ-TCL1 tg and CD73-/- breedings
	PRIMER	EXPECTED BP	SEQUENCE
	CD73KO forward	280	5’ CTT GGG TGG AGA GGC TAT TC-3’
	CD73KO reverse		5’ AGG TGA GAT GAC AGG AGA TC-3’
	CD73WT forward	402	5’ GAA GAT GAA ATC TCT GCA TTG CAG-3’
	CD73WT reverse		5’ GGC TGA CCT TTG TCT GGA GAT CA-3’
	THERMOCYCLING PROTOCOL
	TEMPERATURE	TIME
	94°C	4 min
	94°C	30 sec	Repeat 35X
	60°C	30 sec
	72°C	30 sec
	72°C	5 min
	4°C	Hold
	PRIMER	EXPECTED BP	SEQUENCE
	Eµ-TCL1 tg forward	322	CTG GCA GCA GCT CGA GAA GC
	Eµ-TCL1 tg reverse		ACA CTC GGG GAG GCA GTC AC
	Universal forward	237	AGC CCT TGG GGA STT GAA TTG CTG
	Universal reverse		GCA CTC CAG AGG ACA GCR GTG TCA ATA
	THERMOCYCLING PROTOCOL
	TEMPERATURE	TIME
	95°C	3 min
	95°C	15 sec	Repeat 35X
	65°C	15 sec
	72°C	20 sec
	4°C	Hold

## Sheet: Table S2
	Supplementary Table S2. Fluorescence-conjugated antibodies used for FACS analyses
	FACS MARKER	FLUOROPHORE	MANUFACTURER
	Fixable viability dye	eF506	eBioscience (#65-0866-14)
	ANTI-MOUSE
	CD5	eF450	eBioscience (#48-0051-82)
	B220	BV786	BD (#563894)
		FITC	BD (#553084)
	CD39	PerCP-eF710	eBioscience (#46-0391-82)
	CD73	PE-Cy7	eBioscience (#25-0731-82)
	PD-L1	PE	BD (#558091)
	CD3	APC	BD (#553066)
	CD4	BUV-737	BD (#612844)
	CD8	V450	BD (#560471)
		BV650	BD (#563234)
	FoxP3	Alexa Fluor 488	eBioscience (#53-5773-82)
	CD44	FITC	BD (#553133)
	CD62L	PE-CF594	BD (#562404)
	IFNg	PE	BD (#554412)
	ANTI-HUMAN
	CD5	V450	BD (#560847)
	CD19	Alexa Fluor 700	BD (#561031)
	CD73	APC	BD (#560847)
	CD39	PE	BD (#555464)
	CD38	FITC	BioLegend (#303504)
